# Supplementary material
Source: publisher figshare collection journal article supplement (https://acs.figshare.com/ndownloader/files/5182795)
Supplement: Supplementary file 1 [file 5182795]

## 2-Aminothiazole-Derived Opiates –Bioisosteric Replacement of Phenols

Ao Zhang,<sup>a</sup> Wennan Xiong,<sup>a</sup> James E. Hilbert,<sup>b</sup> Emily K. DeVita,<sup>b</sup> Jean M. Bidlack,<sup>b</sup> and John L.

Neumeyer<sup>a,\*</sup>

<sup>a</sup>*Alcohol and Drug Abuse Research Center, McLean Hospital, Harvard Medical School, 115 Mill Street, Belmont, MA 02478, USA*

<sup>b</sup>*Department of Pharmacology and Physiology, School of Medicine and Dentistry, University of Rochester, Rochester, NY 14642, USA*

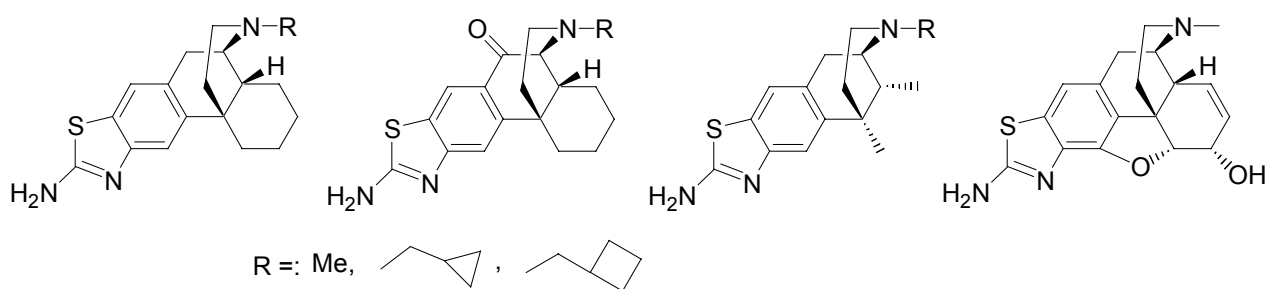

\*To whom correspondence should be addressed. Tel: 617-855-3388; Fax: 617-855-2519; Email: [Neumeyer@mclean.harvard.edu](mailto:Neumeyer@mclean.harvard.edu)
